# Supplementary material for: Conversion Surgery in Metastatic Gastric Cancer and Cancer Dormancy as a Prognostic Biomarker
Source: PubMed Central journal article supplement (PMC7016667; doi:10.3390/cancers12010086), 2019-12-30
Supplement: cancers-12-00086-s001.pdf [file cancers-12-00086-s001.pdf]

## Supplementary Materials: Conversion Surgery in Metastatic Gastric Cancer and Cancer Dormancy as a Prognostic Biomarker

Hun Jee Choe, Jin Won Kim, Song-Hee Han, Ju Hyun Lee, Sang-Hoon Ahn, Do Joong Park, Ji-Won Kim, Yu Jung Kim, Hye Seung Lee, Jee Hyun Kim, Hyung-Ho Kim and Keun-Wook Lee

**Table S1.** The characteristics and clinical course of patients who received noncurative resection with conversion surgery.

| Case No. | Age (Years) | Sex | Initial Metastatic Sites                  | Initial Biological Category before Palliative Chemotherapy | Initial Chemotherapy | Chemotherapy Duration before Conversion Surgery (Months) | chemotherapy Response | Operation                               | Curativity | TNM Stage | Maintenance Chemotherapy | Recur | Survival Status | Overall Survival (Months) |
|----------|-------------|-----|-------------------------------------------|------------------------------------------------------------|----------------------|----------------------------------------------------------|-----------------------|-----------------------------------------|------------|-----------|--------------------------|-------|-----------------|---------------------------|
| 1        | 65          | M   | Retroperitoneal LN                        | 2                                                          | XP                   | 11.1                                                     | PR                    | DG with uncut R-en-Y anastomosis        | R2         | pT3N2M1   | Yes                      | Yes   | expired         | 43.6                      |
| 2        | 58          | M   | Peritoneal seeding, paraaortic LN         | 3                                                          | XP + Herceptin       | 5.1                                                      | NE                    | TG                                      | R2         | pT4N3M1   | Yes                      | Yes   | expired         | 27.4                      |
| 3        | 39          | F   | paraaortic LN                             | 2                                                          | Sunitinib + XELOX    | 4.9                                                      | PR                    | extended TG + D3 dissection             | R2         | pT4N3M1   | Yes                      | Yes   | expired         | 12.2                      |
| 4        | 75          | M   | Celiac axis, pancreas, Peritoneal seeding | 4                                                          | TS1 + Oxaliplatin    | 8.8                                                      | NE                    | TG + right hemicolectomy, peritonectomy | R2         | pT3N2M1   | Yes                      | Yes   | expired         | 14.7                      |

LN, lymph nodes; XELOX capecitabine and oxaliplatin; XP capecitabine and cisplatin; TS1, Tegafur/gimeracil/oteracil; PR, partial response; NE, not evaluable for response; TG, total gastrectomy; DG, distal gastrectomy; TNM, tumor-node-metastasis.

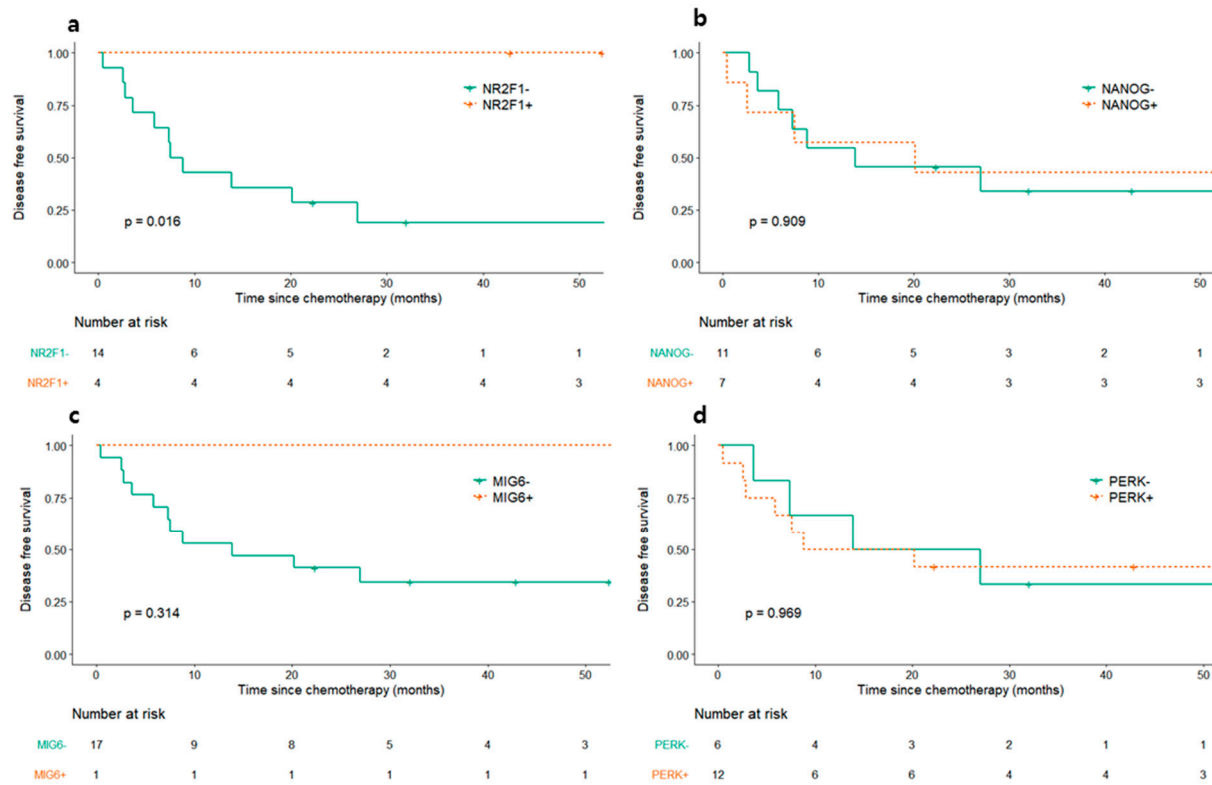

Figure S1. DFS from conversion surgery with R0 resection according to cancer dormancy marker expression.

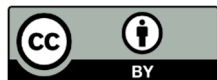

© 2020 by the authors. Licensee MDPI, Basel, Switzerland. This article is an open access article distributed under the terms and conditions of the Creative Commons Attribution (CC BY) license (<http://creativecommons.org/licenses/by/4.0/>).
